# Supplementary material for: Continuing EGFR-TKI beyond radiological progression in patients with advanced or recurrent, EGFR mutation-positive non-small-cell lung cancer: an observational study
Source: PubMed Central journal article supplement — ESMO Open. 2017 Sep 14;2(4):e000214. doi: 10.1136/esmoopen-2017-000214 (PMC5604715; doi:10.1136/esmoopen-2017-000214), 2017-09-14
Supplement: esmoopen-2017-000214supp001.pdf [file esmoopen-2017-000214supp001.pdf]

## **Online Supplementary Tables**

### **Online Supplementary Table S1. EGFR-TKI Treatment**

|                            |     |      |
|----------------------------|-----|------|
| Dose reduction of EGFR-TKI |     |      |
| N, %                       |     |      |
| Dose reduction performed   | 192 | 33.3 |
| No dose modification       | 384 | 66.5 |
| Unknown                    | 1   | 0.2  |

EGFR, epidermal growth factor receptor; TKI, tyrosine kinase inhibitor.

**Online Supplementary Table S2. Patient Characteristics of Each Study Group**

| Characteristics           | Group (number, %) |            |           |           |           |
|---------------------------|-------------------|------------|-----------|-----------|-----------|
|                           | A                 | B          | C         | D         | E         |
|                           | (N = 168)         | (N = 186)  | (N = 97)  | (N = 96)  | (N = 30)  |
| <b>TKI agent</b>          |                   |            |           |           |           |
| Gefitinib                 | 160 (95.2)        | 167 (89.8) | 91 (93.8) | 82 (85.4) | 29 (96.7) |
| Erlotinib                 | 8 (4.8)           | 19 (10.2)  | 6 (6.2)   | 14 (14.6) | 1 (3.3)   |
| <b>Gender</b>             |                   |            |           |           |           |
| Men/women                 | 52/116            | 62/124     | 21/76     | 29/67     | 13/17     |
|                           | 31.0/69.0         | 33.3/66.7  | 21.7/78.4 | 30.2/69.8 | 43.3/56.7 |
| <b>Age (years)</b>        |                   |            |           |           |           |
| Median                    | 67                | 68.5       | 69        | 75        | 71        |
| Range                     | 38-93             | 31-88      | 27-93     | 45-89     | 57-88     |
| <b>PS</b>                 |                   |            |           |           |           |
| 0                         | 45 (26.8)         | 68 (36.6)  | 32 (33.0) | 27(28.1)  | 16 (53.3) |
| 1                         | 75 (44.6)         | 80 (43.0)  | 42 (43.3) | 40 (41.7) | 9 (30.0)  |
| 2                         | 27 (16.1)         | 23 (12.4)  | 16 (16.5) | 15 (15.6) | 3 (10.0)  |
| 3                         | 16 (9.5)          | 11 (5.9)   | 6 (6.2)   | 11 (11.5) | 1 (3.3)   |
| 4                         | 5 (3.0)           | 4 (2.2)    | 1 (1.0)   | 1 (1.0)   | 0 (0)     |
| Unknown                   | 0 (0)             | 0 (0)      | 0 (0)     | 2 (2.1)   | 1 (3.3)   |
| <b>Cancer staging</b>     |                   |            |           |           |           |
| IIIA                      | 145 (97.3)        | 156 (94.5) | 78 (97.5) | 73 (91.3) | 14 (77.8) |
| IIIB                      | 3 (2.0)           | 8 (4.8)    | 2 (2.5)   | 3 (3.7)   | 2 (11.1)  |
| IV                        | 1 (0.7)           | 1 (0.7)    | 0 (0)     | 4 (5.0)   | 2 (11.1)  |
| <b>Site of metastasis</b> |                   |            |           |           |           |
| Bone                      | 92 (37.3)         | 65 (32.0)  | 43 (31.8) | 44 (37.9) | 9 (39.1)  |
| Lung                      | 65 (26.3)         | 74 (36.4)  | 51 (37.8) | 39 (33.6) | 11 (47.8) |
| Brain                     | 69 (27.9)         | 46 (22.7)  | 32 (23.7) | 22 (19.0) | 2 (8.7)   |
| Liver                     | 21 (8.5)          | 18 (8.9)   | 9 (6.7)   | 11 (9.5)  | 1 (4.4)   |

**Online Supplementary Table S2. Patient Characteristics of Each Study Group (Continued)**

| Characteristics                 | Group (number, %) |            |           |           |           |
|---------------------------------|-------------------|------------|-----------|-----------|-----------|
|                                 | A                 | B          | C         | D         | E         |
|                                 | (N = 168)         | (N = 186)  | (N = 97)  | (N = 96)  | (N = 30)  |
| <b>Histology</b>                |                   |            |           |           |           |
| Adenocarcinoma                  | 165 (98.2)        | 181 (97.3) | 96 (99.0) | 95 (99.0) | 30 (100)  |
| NSCLC (not otherwise specified) | 1 (0.6)           | 4 (2.2)    | 1 (1.0)   | 1 (1.0)   | 0 (0.0)   |
| Other                           | 2 (1.2)           | 1 (0.5)    | 0 (0.0)   | 0 (0.0)   | 0 (0.0)   |
| <b>EGFR mutation subtype</b>    |                   |            |           |           |           |
| Exon 19 deletion                | 86 (51.2)         | 93 (50.0)  | 37 (38.2) | 45 (46.9) | 18 (60.0) |
| Exon 21 L858R                   | 77 (45.8)         | 84 (45.2)  | 56 (57.7) | 45 (46.9) | 12 (40.0) |
| Other                           | 5 (3.0)           | 9 (4.8)    | 4 (4.1)   | 6 (6.2)   | 0 (0.0)   |
| <b>Smoking status</b>           |                   |            |           |           |           |
| Never smoked                    | 102 (60.7)        | 119 (64.0) | 75 (77.3) | 67 (69.8) | 18 (60.0) |
| Current smoker                  | 20 (11.9)         | 11 (5.9)   | 6 (6.2)   | 5 (5.2)   | 12 (40.0) |
| Previous smoker                 | 44 (26.2)         | 56 (30.1)  | 16 (16.5) | 24 (25.0) | 0 (0.0)   |
| Unknown                         | 2 (1.2)           | 0 (0.0)    | 0 (0.0)   | 0 (0.0)   | 0 (0.0)   |
| <b>Comorbidity</b>              |                   |            |           |           |           |
| COPD                            | 4 (2.4)           | 6 (3.2)    | 2 (2.1)   | 9 (9.4)   | 1 (3.3)   |
| Hepatic disease                 | 1 (0.6)           | 3 (1.6)    | 0 (0.0)   | 2 (2.1)   | 1 (3.3)   |
| Interstitial lung disease       | 1 (0.6)           | 1 (0.6)    | 0 (0.0)   | 1 (1.0)   | 0 (0.0)   |
| None of the above               | 162 (96.4)        | 176 (94.6) | 95 (97.9) | 84 (87.5) | 28 (93.4) |
| <b>Previous treatment</b>       |                   |            |           |           |           |
| None                            | 108 (64.3)        | 138(74.2)  | 64 (66.0) | 69 (71.9) | 17 (56.7) |
| Surgery                         | 10 (5.9)          | 16 (8.6)   | 12 (12.4) | 13 (13.5) | 9 (30.0)  |
| Radiation                       | 45 (26.8)         | 25 (13.4)  | 18 (18.5) | 12 (12.5) | 1 (3.3)   |
| Surgery + radiation             | 5 (3.0)           | 7 (3.8)    | 3 (3.1)   | 2 (2.1)   | 3 (10.0)  |

COPD, chronic obstructive pulmonary disease; EGFR, epidermal growth factor receptor; NSCLC, non-small-cell lung carcinoma; PS, performance status; TKI, tyrosine kinase inhibitor.

**Online Supplementary Table S3. EGFR-TKI Therapy of Each Study Group**

| Characteristics                                    | Group (number, %) |           |          |          |          |
|----------------------------------------------------|-------------------|-----------|----------|----------|----------|
|                                                    | A                 | B         | C        | D        | E        |
|                                                    | (N = 168)         | (N = 186) | (N = 97) | (N = 96) | (N = 30) |
| <b>Best response</b>                               |                   |           |          |          |          |
| CR                                                 | 2(1.2)            | 5(2.7)    | 0(0.0)   | 3(3.1)   | 1(3.3)   |
| PR                                                 | 109(64.9)         | 136(73.1) | 78(80.4) | 45(46.9) | 19(63.3) |
| SD                                                 | 38(22.6)          | 24(12.9)  | 17(17.5) | 28(29.2) | 7(23.3)  |
| PD                                                 | 11(6.5)           | 18(9.7)   | 2(2.1)   | 2(2.1)   | 0(0.0)   |
| NE                                                 | 8(4.8)            | 3(1.6)    | 0(0.0)   | 17(17.7) | 2(6.7)   |
| Unknown                                            | 0(0.0)            | 0(0.0)    | 0(0.0)   | 1(1.0)   | 1(3.4)   |
| <b>Dose reduction and change in EGFR-TKI</b>       |                   |           |          |          |          |
| Dose reduction and/or change in schedule           | 53(31.6)          | 54(29.0)  | 44(45.3) | 32(30.3) | 9(30.0)  |
| None                                               | 115(68.4)         | 132(71.0) | 53(54.7) | 64(66.7) | 20(66.7) |
| Unknown                                            | 0(0.0)            | 0(0.0)    | 0(0.0)   | 0(0.0)   | 1(3.3)   |
| <b>Combined treatment modality during EGFR-TKI</b> |                   |           |          |          |          |
| Surgery                                            | 2(1.2)            | 8(4.3)    | 1(1.0)   | 1(1.0)   | 0(0.0)   |
| Radiotherapy                                       | 32(19.0)          | 22(11.8)  | 43(44.3) | 7(7.3)   | 4(13.3)  |
| Chemotherapy                                       | 2(1.2)            | 5(2.7)    | 7(7.2)   | 0(0.0)   | 0(0.0)   |
| None                                               | 132(78.6)         | 151(81.2) | 46(47.4) | 88(91.7) | 26(86.7) |
| <b>Combined treatment location during EGFR-TKI</b> |                   |           |          |          |          |
| Brain                                              | 20(48.8)          | 13(38.2)  | 22(50.0) | 4(44.4)  | 0(0.0)   |
| Vertebra                                           | 7(17.1)           | 6(17.7)   | 12(27.3) | 4(44.4)  | 4(100)   |
| Bone (other than vertebra)                         | 11(26.8)          | 12(35.3)  | 7(15.9)  | 0(0.0)   | 0(0.0)   |
| Primary tumor                                      | 2(4.9)            | 0(0.0)    | 2(4.5)   | 1(11.2)  | 0(0.0)   |
| Mediastinum                                        | 0(0.0)            | 1(2.9)    | 1(2.3)   | 0(0.0)   | 0(0.0)   |
| Liver                                              | 0(0.0)            | 2(5.9)    | 0(0.0)   | 0(0.0)   | 0(0.0)   |
| Pericardium                                        | 1(2.4)            | 0(0.0)    | 0(0.0)   | 0(0.0)   | 0(0.0)   |

**Online Supplementary Table S3. EGFR-TKI Therapy of Each Study Group (Continued)**

| Characteristics            | Group (number, %) |           |          |          |          |
|----------------------------|-------------------|-----------|----------|----------|----------|
|                            | A                 | B         | C        | D        | E        |
|                            | (N = 168)         | (N = 186) | (N = 97) | (N = 96) | (N = 30) |
| Adverse events (≥ Grade 3) |                   |           |          |          |          |
| Skin                       |                   |           |          |          |          |
| Grade 3                    | 7(20.6)           | 10(25.6)  | 4(14.8)  | 6(10.7)  | 1(20.0)  |
| Diarrhea                   |                   |           |          |          |          |
| Grade 3                    | 0(0.0)            | 2(5.1)    | 3(11.1)  | 3(5.3)   | 0(0.0)   |
| Liver dysfunction          |                   |           |          |          |          |
| Grade 3                    | 24(70.6)          | 17(43.6)  | 16(59.3) | 24(42.8) | 4(80.0)  |
| Grade 4                    | 0(0.0)            | 0(0.0)    | 0(0.0)   | 2(3.6)   | 0(0.0)   |
| Interstitial lung disease  |                   |           |          |          |          |
| Grade 3                    | 1(2.9)            | 1(2.6)    | 0(0.0)   | 7(12.5)  | 0(0.0)   |
| Grade 4                    | 0(0.0)            | 0(0.0)    | 0(0.0)   | 1(1.8)   | 0(0.0)   |
| Grade 5                    | 0(0.0)            | 0(0.0)    | 0(0.0)   | 2(5.4)   | 0(0.0)   |
| Other                      |                   |           |          |          |          |
| Grade 3                    | 1(2.9)            | 8(20.5)   | 4(14.8)  | 7(12.5)  | 0(0.0)   |
| Grade 4                    | 1(2.9)            | 1(2.6)    | 0(0.0)   | 2(3.6)   | 0(0.0)   |
| Grade 5                    | 0(0.0)            | 0(0.0)    | 0(0.0)   | 1(1.8)   | 0(0.0)   |

**Online Supplementary Table S4. Reasons for Physicians Choosing to Discontinue EGFR-TKI Therapy**

| Characteristics      | Total   |      | Group C |      |
|----------------------|---------|------|---------|------|
|                      | N = 536 | (%)  | n = 87  | (%)  |
| RECIST PD            | 251     | 46.8 | 8*      | 9.2  |
| Clinical PD          | 242     | 45.2 | 86      | 98.9 |
| Adverse Event        | 77      | 14.4 | 1       | 1.2  |
| Patient's preference | 9       | 1.7  | 0       | 0    |
| Physician's decision | 7       | 1.3  | 0       | 0    |
| Other                | 16      | 3.0  | 3       | 3.5  |

\*EGFR-TKI therapy was discontinued, at the discretion of the attending physicians, in eight patients due to secondary radiological progression after continuation of first radiological progression.

EGFR, epidermal growth factor receptor; PD, progressive disease; RECIST, Response Evaluation Criteria in Solid

Tumors; TKI, tyrosine kinase inhibitor.

**Online Supplementary Table S5. Details of Clinical Progression**

| Characteristics                    | Group A    | Group C    | Total       |
|------------------------------------|------------|------------|-------------|
|                                    | (n = 168)  | (n = 97)   |             |
| Emergence of symptoms              | 92 (54.8%) | 43 (44.3%) | 135 (50.9%) |
| Deterioration of PS                | 59 (35.1%) | 33 (34.0%) | 92 (34.7%)  |
| Threat to major organs             | 50 (29.8%) | 14 (14.4%) | 64 (24.2%)  |
| Unequivocal multiorgan progression | 46 (27.4%) | 43 (44.3%) | 89 (33.6%)  |

PS, performance status
